# Supplementary material for: C-, N-, S-, and P-Substrate Spectra in and the Impact of Abiotic Factors on Assessing the Biotechnological Potential of Paracoccus pantotrophus
Source: MDPI journal article supplement (doi:10.3390/applmicrobiol3010013), 2023-01-28
Supplement: s1 [file s1]

## Supplementary Materials

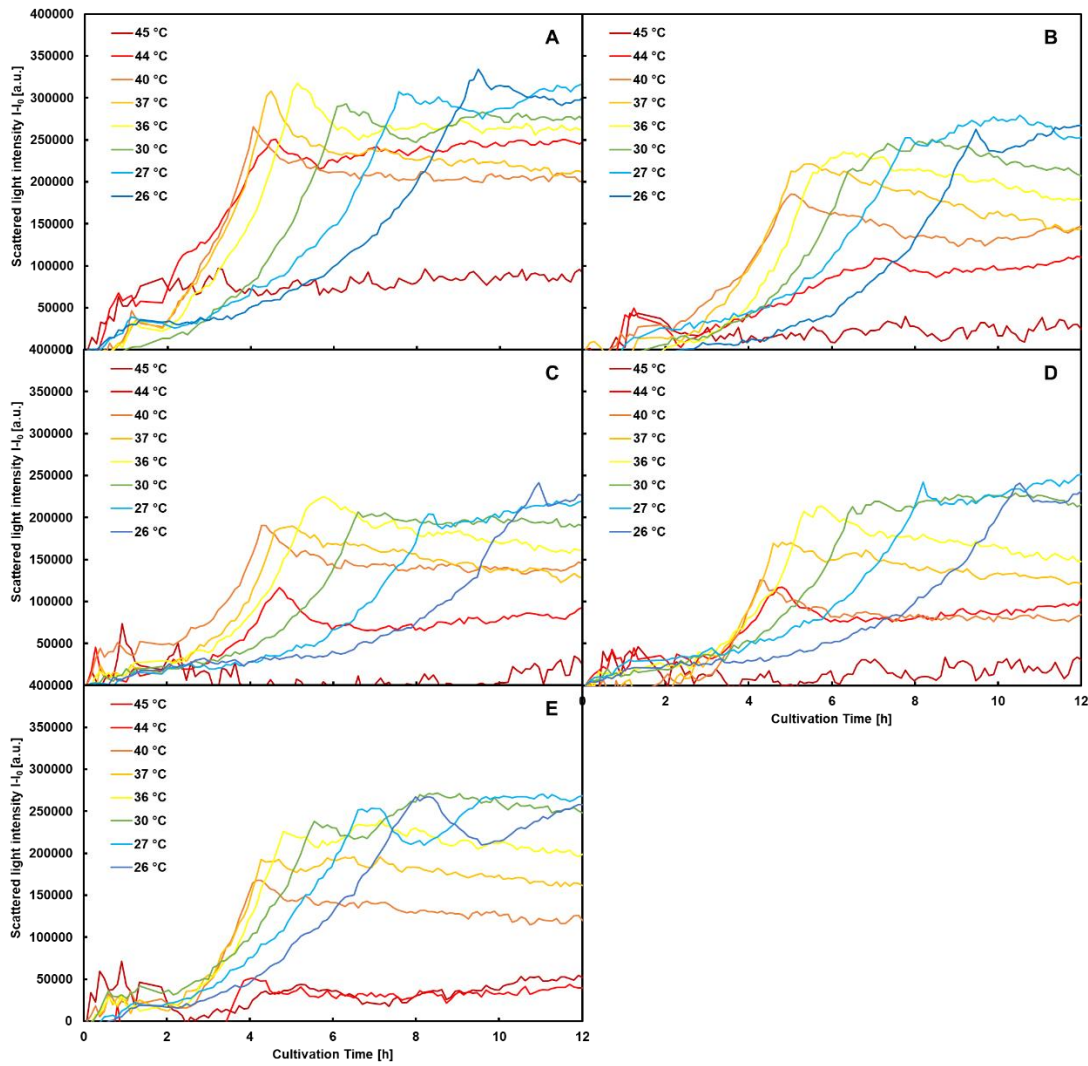

**Figure S1.** Determining the temperature optimum for growth of the five *P. pantotrophus* strains. The cultures were monitored for 12 hours using a custom-made biolector [30] in 48-well Microfluidic FlowerPlates (MTP-48-B, Beckman Coulter GmbH) with each well corresponding to a different temperature. Shown are the values for scattered light in arbitrary units (a.u.) as a proxy for biomass concentration. The strains were grown in LB medium. A: DSM 2944<sup>T</sup>, B: DSM 11072, C: DSM 11073, D: DSM 11104, E: DSM 65.

**Table S1.** Overview of  $\Delta$ AUC (area under curve) of all positive tested carbon sources for *P. pantotrophus* DSM 2944<sup>T</sup>. The green bars show the  $\Delta$ AUC as an indicator of respiration over time minus the negative control. All compounds with  $\Delta$ AUC >0 indicate a positive effect.

| Saccharides              | $\Delta$ AUC                                                                      | Amino acids        | $\Delta$ AUC                                                                       | Organic acids                | $\Delta$ AUC                                                                        | Sugar derivative        | $\Delta$ AUC                                                                        | Other                                | $\Delta$ AUC                                                                        |
|--------------------------|-----------------------------------------------------------------------------------|--------------------|------------------------------------------------------------------------------------|------------------------------|-------------------------------------------------------------------------------------|-------------------------|-------------------------------------------------------------------------------------|--------------------------------------|-------------------------------------------------------------------------------------|
| D-Ribose                 |  | D-Alanine          |  | Fumaric acid                 |  | D-Mannitol              |  | D-Glucosamine                        |  |
| D-Fructose               |  | L-Alanine          |  | L-Malic acid                 |  | $\beta$ -Methyl-glucose |  | M-Inositol                           |  |
| Sucrose                  |  | D,L-Carnitine      |  | D-Gluconic acid              |  | Dulcitol                |  | Pectin                               |  |
| D-Arabinose              |  | L-Proline          |  | D,L-Malic acid               |  | Glucuronamide           |  | Methyl pyruvate                      |  |
| L-Arabinose              |  | Hydroxyl-L-proline |  | Propionic acid               |  |                         |                                                                                     | 3-O-B-D-Galactopyranosyl-D-arabinose |  |
| D-Mannose                |  | L-Glutamic acid    |  | L-Lactic acid                |  |                         |                                                                                     | Glycogen                             |  |
| Dextrin                  |  | L-asparagine       |  | Formic acid                  |  |                         |                                                                                     | 2,3-Butanone                         |  |
| L-Sorbose                |  | L-Ornithine        |  | Quinic acid                  |  |                         |                                                                                     | D,L-Octopamine                       |  |
| D-Tagatose               |  | Glycine            |  | 5-Keto-D-Gluconic acid       |  |                         |                                                                                     | Thymidine                            |  |
| D-Galactose              |  | D-Aspartic acid    |  | Glyoxylic acid               |  |                         |                                                                                     | D-Lactic acid methyl ster            |  |
| L-Rhamnose               |  |                    |                                                                                    | Caproic acid                 |  |                         |                                                                                     | Inulin                               |  |
| D,L-A-Glycerol-phosphate |  |                    |                                                                                    | $\Gamma$ -Amino Butyric acid |  |                         |                                                                                     | Mannan                               |  |
| D-Raffinose              |  |                    |                                                                                    | A-Keto-Butyric acid          |  |                         |                                                                                     | Putrescine                           |  |
|                          |                                                                                   |                    |                                                                                    | 4-HydroxyBenzoic acid        |  |                         |                                                                                     | D-Fructose-6-phosphate               |  |
|                          |                                                                                   |                    |                                                                                    | Glycyl-L-Glutamic acid       |  |                         |                                                                                     | Laminarin                            |  |
|                          |                                                                                   |                    |                                                                                    | Acetoacetic acid             |  |                         |                                                                                     |                                      |                                                                                     |
|                          |                                                                                   |                    |                                                                                    | Succinamic acid              |  |                         |                                                                                     |                                      |                                                                                     |
|                          |                                                                                   |                    |                                                                                    | Oxalomalic acid              |  |                         |                                                                                     |                                      |                                                                                     |
|                          |                                                                                   |                    |                                                                                    | D-Gluconic acid              |  |                         |                                                                                     |                                      |                                                                                     |
|                          |                                                                                   |                    |                                                                                    | L-Pyrogutamic acid           |  |                         |                                                                                     |                                      |                                                                                     |
|                          |                                                                                   |                    |                                                                                    | D-Tartaric acid              |  |                         |                                                                                     |                                      |                                                                                     |

**Table S2.** Overview of  $\Delta$ AUC (area under curve) of all positive tested nitrogen sources for *P. pantotrophus* DSM 2944<sup>T</sup>. The green bars show the  $\Delta$ AUC as an indicator of respiration over time minus the negative control. All compounds with  $\Delta$ AUC >0 indicate a positive effect.

| Amino acids            | $\Delta$ AUC                                                                        | Nucleosid/base | $\Delta$ AUC                                                                      | Amine           | $\Delta$ AUC                                                                        | Mixture | $\Delta$ AUC                                                                        | Other                          | $\Delta$ AUC                                                                         |
|------------------------|-------------------------------------------------------------------------------------|----------------|-----------------------------------------------------------------------------------|-----------------|-------------------------------------------------------------------------------------|---------|-------------------------------------------------------------------------------------|--------------------------------|--------------------------------------------------------------------------------------|
| L-Cysteine             |    | Guanosine      |  | N-Amylamine     |  | Ala-Gly |  | Urea                           |   |
| L-Histidine            |    | Guanine        |  | Ethylenediamine |  | Gly-Asn |  | Uric acid                      |   |
| Xanthine               |    | Uracil         |  | Biuret          |  | Gly-Met |  | Allantoin                      |   |
| L-Asparagine           |    | Cytosine       |  |                 |                                                                                     | Ala-Glu |  | D-Glutamic acid                |   |
| L-Proline              |    | Thymidine      |  |                 |                                                                                     | Ala-His |  | $\Gamma$ -Amino-N-Butyric acid |   |
| Glycine                |    | Xanthosine     |  |                 |                                                                                     | Ala-Gln |  | $\Delta$ -Amino-N-Valeric acid |   |
| D-Serine               |    | Cytidine       |  |                 |                                                                                     |         |                                                                                     | N-Phthaloyl-L-Glutamic acid    |   |
| L-Tryptophan           |    |                |                                                                                   |                 |                                                                                     |         |                                                                                     | E-Amino-N-Caproic acid         |   |
| N-Acetyl-D-glucosamine |    |                |                                                                                   |                 |                                                                                     |         |                                                                                     | N-Acetyl-D,L-Glutamic acid     |   |
| L-Isoleucine           |    |                |                                                                                   |                 |                                                                                     |         |                                                                                     | D,L-A-Amino-N-Butyric acid     |   |
| L-Threonine            |    |                |                                                                                   |                 |                                                                                     |         |                                                                                     | N-Acetyl-D-mannosamine         |   |
| L-Methionine           |    |                |                                                                                   |                 |                                                                                     |         |                                                                                     | L-Pyroglutamic acid            |   |
| L-Citrulline           |    |                |                                                                                   |                 |                                                                                     |         |                                                                                     | Nitrate                        |   |
| D-Glucosamine          |    |                |                                                                                   |                 |                                                                                     |         |                                                                                     | L-Glutamic acid                |   |
| L-Valine               |    |                |                                                                                   |                 |                                                                                     |         |                                                                                     | Nitrite                        |   |
| D-Galactosamine        |    |                |                                                                                   |                 |                                                                                     |         |                                                                                     | L-Aspartic acid                |   |
| D-Mannosamine          |    |                |                                                                                   |                 |                                                                                     |         |                                                                                     | A-Amino-N-Valeric acid         |   |
| L-Lysine               |    |                |                                                                                   |                 |                                                                                     |         |                                                                                     | D-Aspartic acid                |   |
| Methylamine            |    |                |                                                                                   |                 |                                                                                     |         |                                                                                     | Ethanolamine                   |   |
| Histamine              |   |                |                                                                                   |                 |                                                                                     |         |                                                                                     | Agmatine                       |  |
| L-Ornithine            |  |                |                                                                                   |                 |                                                                                     |         |                                                                                     |                                |                                                                                      |
| L-Homoserine           |  |                |                                                                                   |                 |                                                                                     |         |                                                                                     |                                |                                                                                      |
| D-Lysine               |  |                |                                                                                   |                 |                                                                                     |         |                                                                                     |                                |                                                                                      |
| D-Valine               |  |                |                                                                                   |                 |                                                                                     |         |                                                                                     |                                |                                                                                      |
| L-Glutamine            |  |                |                                                                                   |                 |                                                                                     |         |                                                                                     |                                |                                                                                      |
| L-Alanine              |  |                |                                                                                   |                 |                                                                                     |         |                                                                                     |                                |                                                                                      |
| L-Serine               |  |                |                                                                                   |                 |                                                                                     |         |                                                                                     |                                |                                                                                      |
| N-Butylamine           |  |                |                                                                                   |                 |                                                                                     |         |                                                                                     |                                |                                                                                      |
| Glucuronamide          |  |                |                                                                                   |                 |                                                                                     |         |                                                                                     |                                |                                                                                      |
| Putrescine             |  |                |                                                                                   |                 |                                                                                     |         |                                                                                     |                                |                                                                                      |

**Table S3.** Percentage of amino acid pairs which yielded a positive  $\Delta\text{AUC}$ . The percentages relate to total amount of each pair (in brackets) as it occurred in the screening.

| 1st AA \ 2nd AA | Charged   | Uncharged | Aromatic  | Hydrophobic |
|-----------------|-----------|-----------|-----------|-------------|
| Charged         | 23.5 (17) | 42.9 (7)  | 16.7 (12) | 25.0 (28)   |
| Uncharged       | 12.5 (8)  | 50.0 (6)  | 66.7 (3)  | 57.1 (14)   |
| Aromatic        | 33.3 (9)  | 66.7 (3)  | 55.6 (9)  | 38.9 (18)   |
| Hydrophobic     | 21.9 (32) | 17.4 (23) | 28.0 (25) | 18.0 (61)   |

**Table S4.** Overview of  $\Delta$ AUC (area under curve) of all positive tested sulfur sources for *P. pantotrophus* DSM 2944<sup>T</sup>. The green bars show the  $\Delta$ AUC as an indicator of respiration over time minus the negative control. All compounds with  $\Delta$ AUC >0 indicate a positive effect.

| Amino acids            | $\Delta$ AUC                                                                      | acids                         | $\Delta$ AUC                                                                       | thionine                | $\Delta$ AUC                                                                        | anorganic       | $\Delta$ AUC                                                                        | other                      | $\Delta$ AUC                                                                        |
|------------------------|-----------------------------------------------------------------------------------|-------------------------------|------------------------------------------------------------------------------------|-------------------------|-------------------------------------------------------------------------------------|-----------------|-------------------------------------------------------------------------------------|----------------------------|-------------------------------------------------------------------------------------|
| L-Cysteine             |  | p-Amino benzene sulfonic acid |  | D-Methionine            |  | Dithiophosphate |  | l-Thio- $\beta$ -D-glucose |  |
| L-methionine sulfoxide |  | L-Cysteine sulfinic acid      |  | Lanthionine             |  | Thiophosphate   |  | Cysteamine                 |  |
| L-Cysteinyglycine      |  | L-Cysteic acid                |  | Cystathionine           |  | Tetrathionate   |  | D,L-Lipoamide              |  |
| D-Cysteine             |  | L-Djenkolic acid              |  | Glycyl-L-methionine     |  |                 |                                                                                     |                            |                                                                                     |
| N-Acetyl-L-cysteine    |  | 2-Hydroxyethane sulfonic acid |  | N-Acetyl-D,L-methionine |  |                 |                                                                                     |                            |                                                                                     |
|                        |                                                                                   |                               |                                                                                    | Glutathione             |  |                 |                                                                                     |                            |                                                                                     |

**Table S5.** Overview of  $\Delta$ AUC (area under curve) of all positive tested phosphorus sources for *P. pantotrophus* DSM 2944<sup>T</sup>. The green bars show the  $\Delta$ AUC as an indicator of respiration over time minus the negative control. All compounds with  $\Delta$ AUC >0 indicate a positive effect.

| Nucleo-(cyclic)monophosphate         | $\Delta$ AUC                                                                        | Acids                        | $\Delta$ AUC                                                                       | Organic phosphates            | $\Delta$ AUC                                                                         | Anorganics       | $\Delta$ AUC                                                                        | Other                     | $\Delta$ AUC                                                                        |
|--------------------------------------|-------------------------------------------------------------------------------------|------------------------------|------------------------------------------------------------------------------------|-------------------------------|--------------------------------------------------------------------------------------|------------------|-------------------------------------------------------------------------------------|---------------------------|-------------------------------------------------------------------------------------|
| Uridine-5'-monophosphate             |    | Methylene diphosphonic acid  |  | D-Glucosamine-6-phosphate     |   | Thiophosphate    |  | Phosphoryl choline        |  |
| Cytidine-3'-monophosphate            |    | 2-Aminoethyl phosphonic acid |  | Cysteamine-S-phosphate        |   | Phosphate        |  | Phospho-L-arginine        |  |
| Cytidine-5'-monophosphate            |    | D-3-Phospho-glyceric acid    |  | D-Glucose-6-phosphate         |   | Hypophosphite    |  | O-Phospho-D-tyrosine      |  |
| Uridine-2'-monophosphate             |    | Phosphono acetic acid        |  | D-Mannose-6-phosphate         |   | Pyrophosphate    |  | Phosphocreatine           |  |
| Uridine-3',5'-cyclic monophosphate   |    | D-2-Phospho-glyceric acid    |  | Triethyl phosphate            |   | Trimetaphosphate |  | O-Phosphoryl-ethanolamine |  |
| Thymidine 3'-5'-cyclic monophosphate |    |                              |                                                                                    | D,L-A-Glycerol phosphate      |   |                  |                                                                                     | O-Phospho-L-serine        |  |
| Adenosine-2',3'-cyclic monophosphate |    |                              |                                                                                    | Carbamyl phosphate            |   |                  |                                                                                     | Phosphoenol pyruvate      |  |
| Huanosine-3'-5'-cyclic monophosphate |    |                              |                                                                                    | 2-Deoxy-D-Glucose 6-phosphate |   |                  |                                                                                     | O-Phospho-D-serine        |  |
| Guanosine-3'-monophosphate           |    |                              |                                                                                    | D-Glucose-1-phosphate         |   |                  |                                                                                     |                           |                                                                                     |
| Adenosine-5'-monophosphate           |    |                              |                                                                                    | Inositol hexaphosphate        |   |                  |                                                                                     |                           |                                                                                     |
| Adenosine-2'-monophosphate           |   |                              |                                                                                    | Dithiophosphate               |  |                  |                                                                                     |                           |                                                                                     |
| Adenosine-3',5'-cyclic monophosphate |  |                              |                                                                                    |                               |                                                                                      |                  |                                                                                     |                           |                                                                                     |
| Cytidine-2',3'-cyclic monophosphate  |  |                              |                                                                                    |                               |                                                                                      |                  |                                                                                     |                           |                                                                                     |
| Guanosine-2'-monophosphate           |  |                              |                                                                                    |                               |                                                                                      |                  |                                                                                     |                           |                                                                                     |
| Adenosine-3'-monophosphate           |  |                              |                                                                                    |                               |                                                                                      |                  |                                                                                     |                           |                                                                                     |
| O-Phospho-L-threonine                |  |                              |                                                                                    |                               |                                                                                      |                  |                                                                                     |                           |                                                                                     |
| Guanosine-2',3'-cyclic monophosphate |  |                              |                                                                                    |                               |                                                                                      |                  |                                                                                     |                           |                                                                                     |

**Table S6.** Overview of  $\Delta AUC$  (area under curve) of all tested osmotic regulators for *P. pantotrophus* DSM 2944<sup>T</sup>. The green bars show the positive  $\Delta AUC$  as an indicator of respiration over time minus the negative control, the orange bars show negative  $\Delta AUC$ . All compounds with  $\Delta AUC > 0$  indicate a positive effect.

| NaCl 6 % + osmotic regulator              | $\Delta AUC$ |
|-------------------------------------------|--------------|
| NaCl 6 % + Glutathione                    | Positive     |
| NaCl 6 % + L-Carnitine                    | Positive     |
| NaCl 6 % + Octopine                       | Positive     |
| NaCl 6 % + N-N Dimethylglycine            | Positive     |
| NaCl 6 % + Trehalose                      | Positive     |
| NaCl 6 % (Control)                        | 0            |
| NaCl 6 % + L-Proline                      | Negative     |
| NaCl 6 % + Dimethylsulphonylpropionate    | Negative     |
| NaCl 6 % + Betaine                        | Negative     |
| NaCl 6 % + Glycerol                       | Negative     |
| NaCl 6 % + KCl                            | Negative     |
| NaCl 6 % + Trimethylamine                 | Negative     |
| NaCl 6 % + Trimethylamine-N-oxide         | Negative     |
| NaCl 6 % + MOPS                           | Negative     |
| NaCl 6 % + Ectoine                        | Negative     |
| NaCl 6 % + N-Acetyl-L-glutamine           | Negative     |
| NaCl 6 % + Creatinine                     | Negative     |
| NaCl 6 % + Trigonelline                   | Negative     |
| NaCl 6 % + $\Gamma$ -Amino-N-butyric acid | Negative     |
| NaCl 6 % + $\beta$ -Glutamic acid         | Negative     |
| NaCl 6 % + Choline                        | Negative     |
| NaCl 6 % + Sarcosine                      | Negative     |
| NaCl 6 % + Creatine                       | Negative     |
| NaCl 6 % + Phosphorylcholine              | Negative     |

**Table S7.** Overview of  $\Delta$ AUC (area under curve) of all tested pH protective compounds for *P. pantotrophus* DSM 2944<sup>T</sup>. The green bars show the positive  $\Delta$ AUC as an indicator of respiration over time minus the negative control, the orange bars show negative  $\Delta$ AUC. All compounds with  $\Delta$ AUC >0 indicate a positive effect.

| pH 4.5 + compound        | AUC                                                                                 | pH 9.5 + compound      | AUC                                                                                   |
|--------------------------|-------------------------------------------------------------------------------------|------------------------|---------------------------------------------------------------------------------------|
| L-Homoserine             |    | L-Tryptophan           |    |
| Anthranilic acid         |    | Anthranilic acid       |    |
| L-Lysine                 |    | Urea                   |    |
| Trimethylamine-N-oxide   |    | Phenylethylamine       |    |
| L-Methionine             |    | Hydroxy-L-proline      |    |
| L-Proline                |    | L-Lysine               |    |
| L-Homoarginine           |    | Norvaline              |    |
| Aminobenzoate            |    | L-Phenylalanine        |    |
| D,L-Diamino pimelic acid |    | L-Arginine             |    |
| Urea                     |    | Putrescine             |    |
| L-Aspartic acid          |    | L-Isoleucine           |    |
| A-Amino-N-butyric acid   |    | L-Methionine           |    |
| L-Valine                 |    | L-Ornithine            |    |
| Norvaline                |    | L-Glutamine            |    |
| L-Asparagine             |    | L-Threonine            |    |
| L-Ornithine              |    | L-Proline              |    |
| L-Arginine               |    | Creatine               |    |
| L-Phenylalanine          |    | L-Histidine            |    |
| D-Lysine                 |   | L-Homoserine           |   |
| L-Leucin                 |  | L-Aspartic acid        |  |
| L-Isoleucine             |  | Control                |  |
| L-Glutamine              |  | L-Homoarginine         |  |
| L-Tryptophan             |  | Agmatine               |  |
| 5-Hydroxy lysine         |  | L-Serine               |  |
| L-Cysteic acid           |  | L-Glutamic acid        |  |
| 5-Hydroxy tryptophan     |  | L-Asparagine           |  |
| L-Serine                 |  | Histamine              |  |
| L-Norleucine             |  | Glycine                |  |
| L-Glutamic acid          |  | L-Alanine              |  |
| Control                  |  | Tyrosine               |  |
| L-Histidine              |  | L-Leucine              |  |
| L-Alanin                 |  | Cadeverine             |  |
| Glycine                  |  | Trimethylamine-N-oxide |  |
| L-Threonine              |  | Tyramine               |  |
| Hydroxy-L-proline        |  | L-Valine               |  |
| Tyrosine                 |  | Norleucine             |  |
